# Supplementary material for: Urgent Versus Post-Stabilization Antiretroviral Treatment (ART) in Hospitalized Children: A Randomized Controlled Trial
Source: PubMed Central journal article supplement — Lancet HIV. Author manuscript; Available in PMC 2019 Jan 1. (PMC5777310; doi:10.1016/s2352-3018(17)30167-4), 2017-11-14
Supplement: NIHMS922380-supplement-2.pdf [file NIHMS922380-supplement-2.pdf]

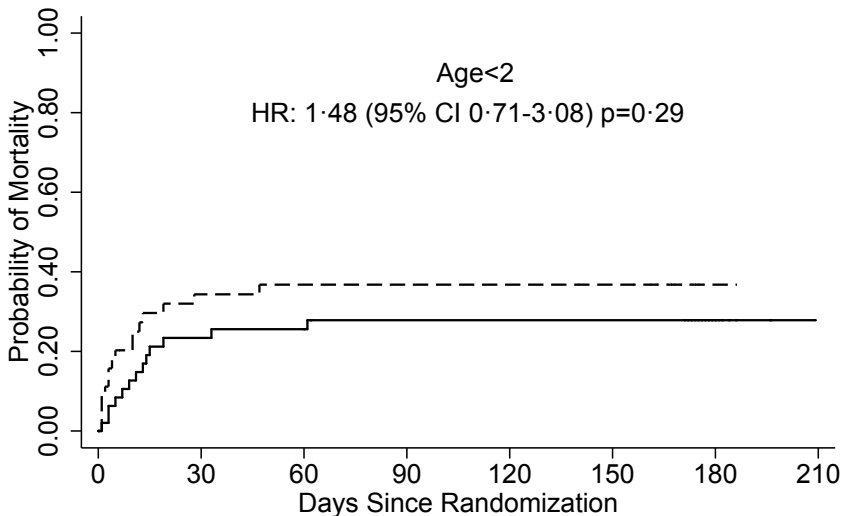

| Number at risk     |    |    |    |    |    |    |    |   |
|--------------------|----|----|----|----|----|----|----|---|
| Post-Stabilization | 49 | 35 | 34 | 31 | 31 | 31 | 13 | 0 |
| Urgent             | 45 | 28 | 26 | 26 | 26 | 25 | 1  | 0 |

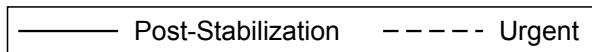

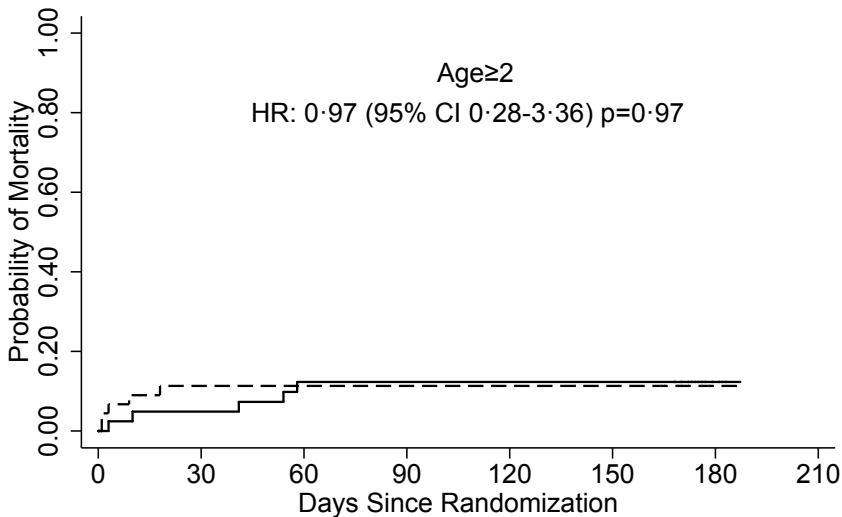

| Number at risk     |    |    |    |    |    |    |   |   |
|--------------------|----|----|----|----|----|----|---|---|
| Post-Stabilization | 42 | 39 | 35 | 35 | 35 | 35 | 7 | 0 |
| Urgent             | 45 | 38 | 38 | 38 | 37 | 36 | 2 | 0 |



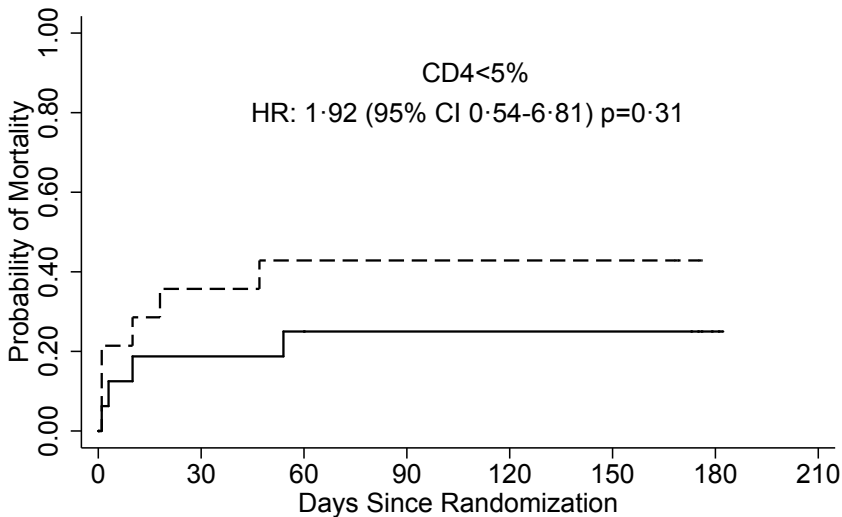

| Number at risk     |    |    |    |    |    |    |   |   |
|--------------------|----|----|----|----|----|----|---|---|
| Post-Stabilization | 16 | 13 | 12 | 11 | 11 | 11 | 3 | 0 |
| Urgent             | 14 | 9  | 8  | 8  | 8  | 8  | 0 | 0 |

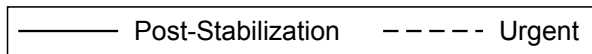

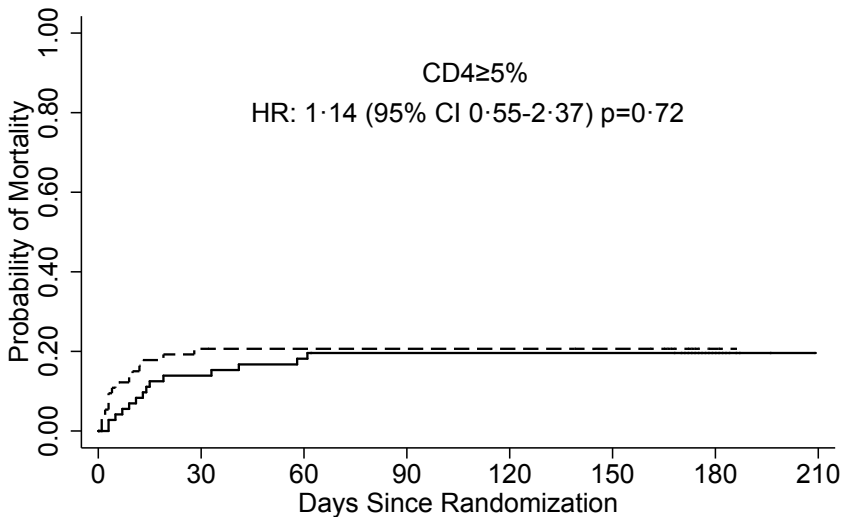

| Number at risk     |    |    |    |    |    |    |    |   |
|--------------------|----|----|----|----|----|----|----|---|
| Post-Stabilization | 75 | 61 | 57 | 55 | 55 | 55 | 17 | 0 |
| Urgent             | 75 | 56 | 55 | 55 | 54 | 53 | 3  | 0 |

— Post-Stabilization    - - - - Urgent

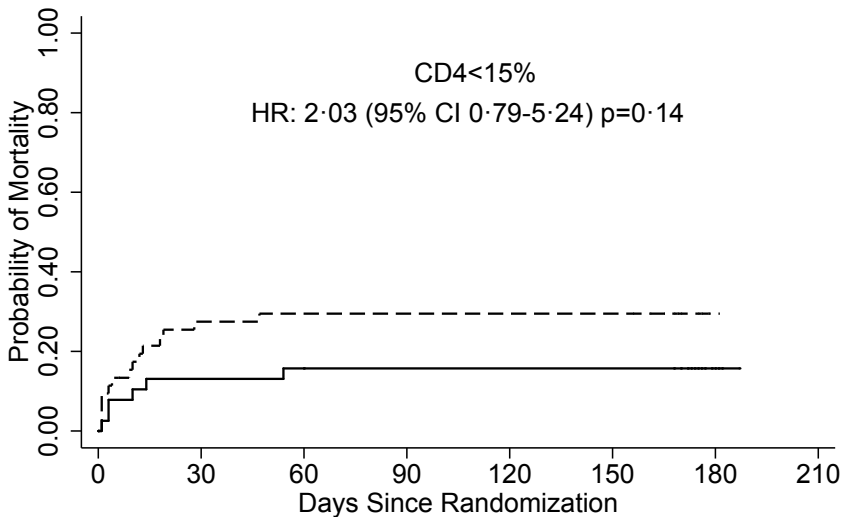

| Number at risk     |    |    |    |    |    |    |   |   |
|--------------------|----|----|----|----|----|----|---|---|
| Post-Stabilization | 39 | 33 | 32 | 31 | 31 | 31 | 8 | 0 |
| Urgent             | 53 | 36 | 35 | 35 | 35 | 35 | 1 | 0 |



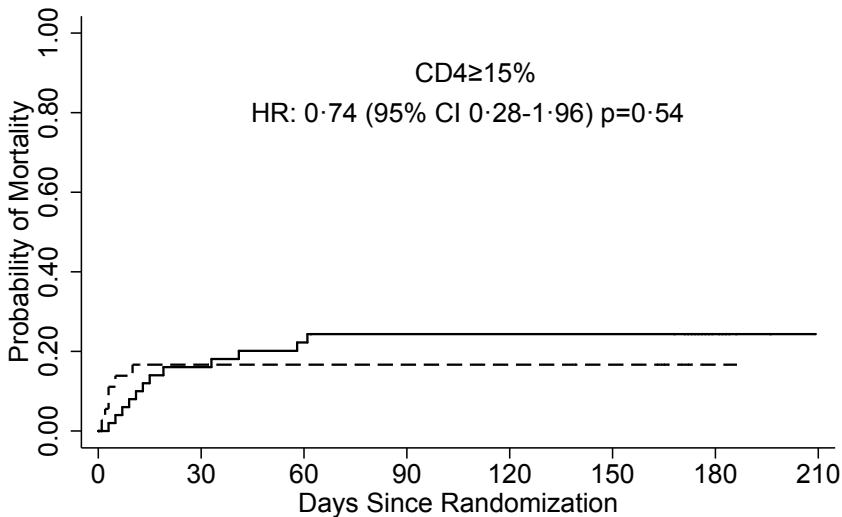

| Number at risk     | 0  | 30 | 60 | 90 | 120 | 150 | 180 | 210 |
|--------------------|----|----|----|----|-----|-----|-----|-----|
| Post-Stabilization | 52 | 41 | 37 | 35 | 35  | 35  | 12  | 0   |
| Urgent             | 36 | 29 | 28 | 28 | 27  | 26  | 2   | 0   |



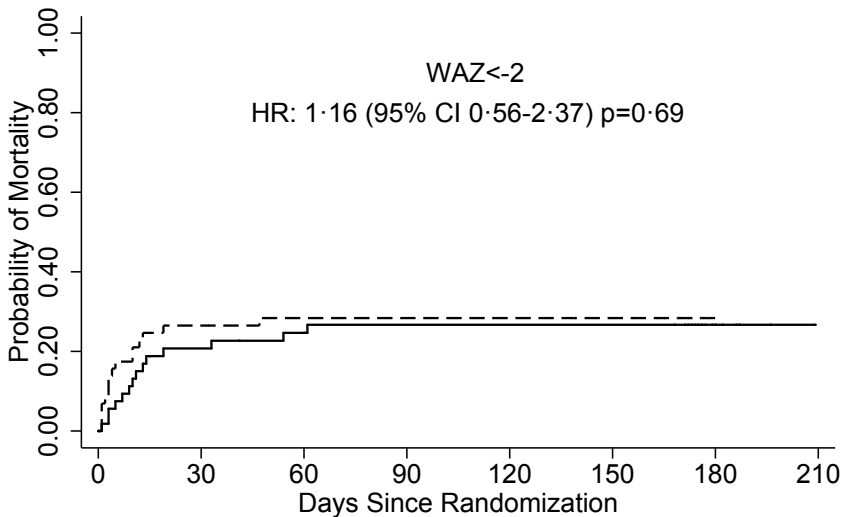

| Number at risk     |    |    |    |    |    |    |   |   |
|--------------------|----|----|----|----|----|----|---|---|
| Post-Stabilization | 55 | 41 | 38 | 36 | 36 | 36 | 8 | 0 |
| Urgent             | 58 | 40 | 38 | 38 | 37 | 36 | 1 | 0 |



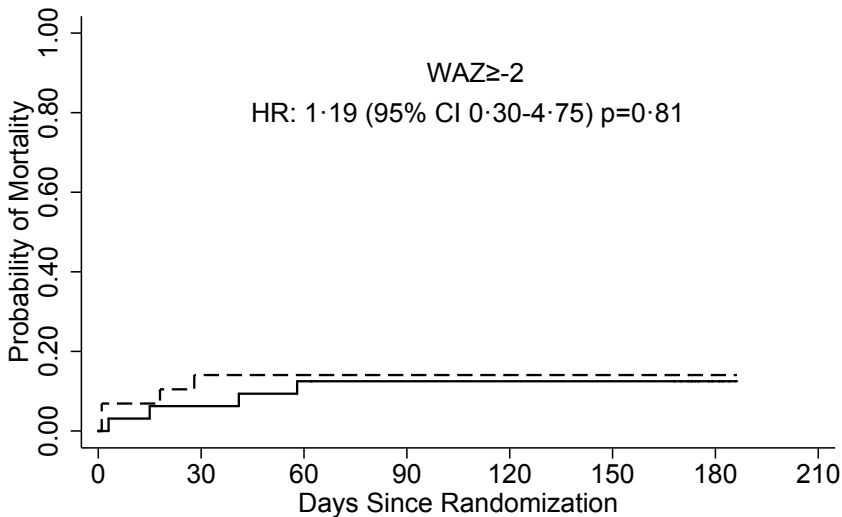

| Number at risk     |    |    |    |    |    |    |    |   |
|--------------------|----|----|----|----|----|----|----|---|
| Post-Stabilization | 33 | 30 | 28 | 27 | 27 | 27 | 10 | 0 |
| Urgent             | 29 | 24 | 24 | 24 | 24 | 23 | 2  | 0 |

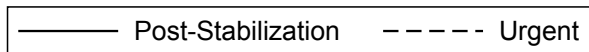



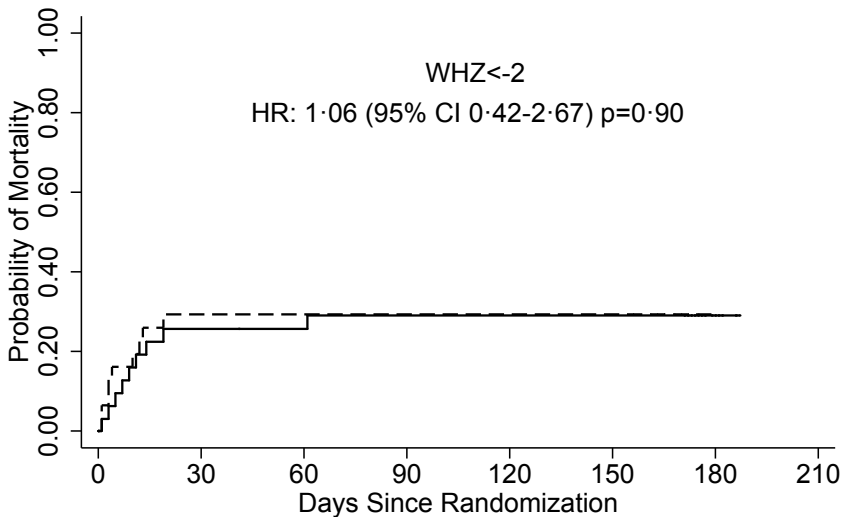

| Number at risk     |    |    |    |    |    |    |   |   |
|--------------------|----|----|----|----|----|----|---|---|
| Post-Stabilization | 33 | 23 | 22 | 21 | 21 | 21 | 5 | 0 |
| Urgent             | 31 | 21 | 21 | 21 | 21 | 20 | 1 | 0 |



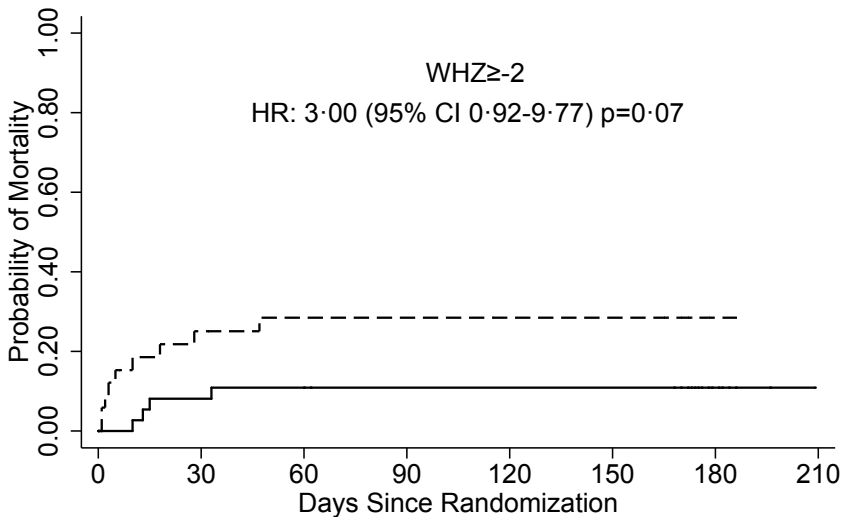

| Number at risk     |    | 0  | 30 | 60 | 90 | 120 | 150 | 180 | 210 |
|--------------------|----|----|----|----|----|-----|-----|-----|-----|
| Post-Stabilization | 38 | 33 | 32 | 30 | 30 | 30  | 30  | 11  | 0   |
| Urgent             | 34 | 23 | 21 | 21 | 20 | 19  | 19  | 1   | 0   |

Post-Stabilization
  Urgent

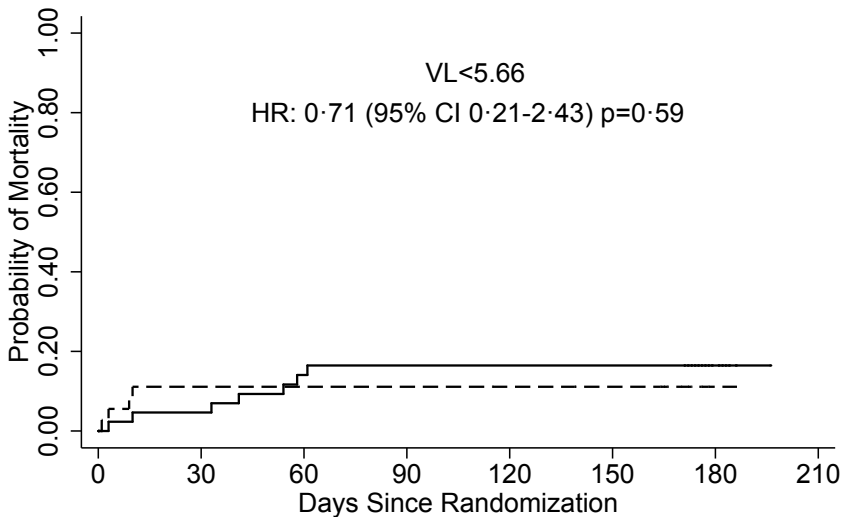

| Number at risk     |    |    |    |    |    |    |    |   |
|--------------------|----|----|----|----|----|----|----|---|
| Post-Stabilization | 45 | 41 | 36 | 35 | 35 | 35 | 11 | 0 |
| Urgent             | 36 | 31 | 31 | 31 | 30 | 29 | 1  | 0 |

— Post-Stabilization    - - - - Urgent

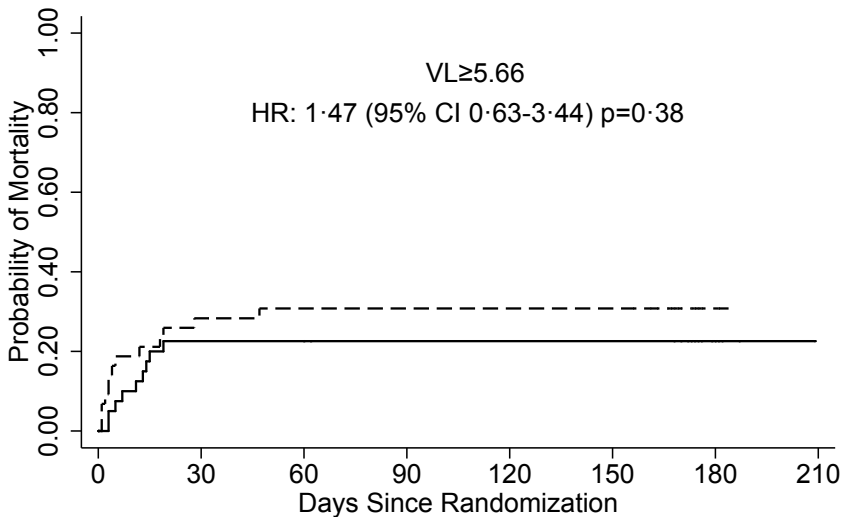

| Number at risk     |    | 0  | 30 | 60 | 90 | 120 | 150 | 180 | 210 |
|--------------------|----|----|----|----|----|-----|-----|-----|-----|
| Post-Stabilization | 41 | 30 | 30 | 28 | 28 | 28  | 28  | 8   | 0   |
| Urgent             | 44 | 30 | 28 | 28 | 28 | 28  | 28  | 2   | 0   |



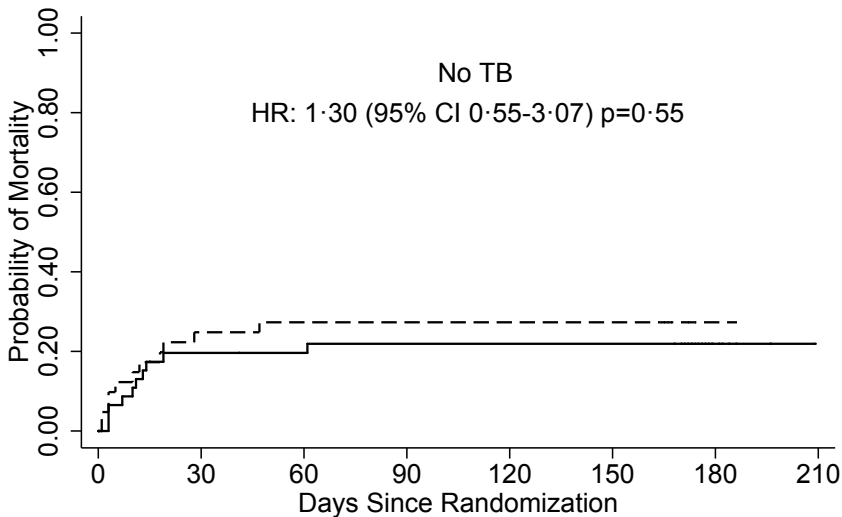

|                    | 0  | 30 | 60 | 90 | 120 | 150 | 180 | 210 |
|--------------------|----|----|----|----|-----|-----|-----|-----|
| Number at risk     |    |    |    |    |     |     |     |     |
| Post-Stabilization | 47 | 36 | 35 | 34 | 34  | 34  | 11  | 0   |
| Urgent             | 42 | 30 | 29 | 29 | 29  | 29  | 1   | 0   |



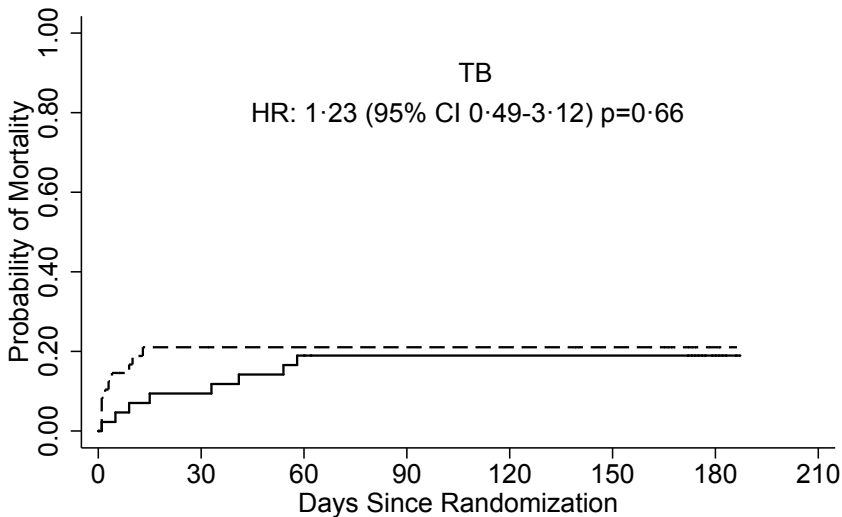

| Number at risk     |    |    |    |    |    |    |   |   |
|--------------------|----|----|----|----|----|----|---|---|
| Post-Stabilization | 44 | 38 | 34 | 32 | 32 | 32 | 9 | 0 |
| Urgent             | 48 | 36 | 35 | 35 | 34 | 32 | 2 | 0 |

— Post-Stabilization    - - - - Urgent
